# Supplementary material for: A dual-species Rydberg array
Source: Springer Nature journal article supplement (doi:10.1038/s41567-024-02638-2), 2024-09-20
Supplement: MOESM1 [file 41567_2024_2638_MOESM1_ESM.pdf]

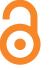

---

# A dual-species Rydberg array

---

In the format provided by the  
authors and unedited

## CONTENTS

|                                                            |    |
|------------------------------------------------------------|----|
| 1. Experimental platform                                   | 1  |
| 2. Midcircuit readout                                      | 2  |
| 3. Rydberg lasers                                          | 3  |
| 4. Electric Field Control                                  | 6  |
| 5. Elimination of Static Electric Field                    | 6  |
| 6. Effect of Static Electric Fields on Förster Interaction | 7  |
| 7. Extraction of $C_6$ and $C_3$ Coefficients              | 8  |
| 8. Choice of Rydberg states for Förster physics            | 8  |
| 8.1. Rydberg interaction landscape                         | 8  |
| 8.2. Numerical studies                                     | 9  |
| 9. SPAM correction                                         | 10 |
| 9.1. Conversion of state-preparation errors to atom loss   | 10 |
| 9.2. Mapping measurement bases to ‘bright, bright’         | 11 |
| 9.3. Readout imperfections                                 | 11 |
| 9.4. Mitigation of SP errors for blockade measurement      | 12 |
| 9.5. SPAM correction of eye diagrams                       | 12 |
| 9.6. SPAM correction of QND measurement                    | 12 |
| 10. QND-ness of auxiliary-based measurement                | 13 |
| 11. Master equation simulations                            | 13 |
| Error sources                                              | 14 |
| 11.1. Blockade strength                                    | 14 |
| 11.2. Atomic state lifetimes                               | 14 |
| 11.3. Atom loss                                            | 14 |
| 11.4. Rydberg detection                                    | 14 |
| 11.5. Dephasing mechanisms                                 | 15 |
| 11.6. Error budget for the two-qubit gate                  | 15 |
| 11.7. Ground-Rydberg simulations                           | 16 |
| 12. Collective driving of intraspecies pairs               | 17 |
| 13. Simultaneous driving with independent Rabi frequencies | 17 |
| 14. Quantum State Transfer                                 | 17 |
| References                                                 | 18 |

## 1. Experimental platform

As in previous work [1], individual Rb and Cs atoms are loaded from a bi-chromatic 3D magneto-optical trap into species-selective optical tweezer arrays (840.6 nm for Rb, 911.3 nm for Cs) generated by independent spatial light modulators (SLMs). The tweezer arrays are focused by a high-NA objective to waists  $\sim 0.9 \mu\text{m}$ , and individually homogenized for uniformity of trap depths [2]. The relative alignment of the two SLM arrays is optimized via measurements of site-wise Stark shifts induced by the first array on the atoms trapped in the second array. The optimization is performed by feedback on mirror positions and the tip, tilt, and blazed grating parameters associated with the SLM phase patterns. In particular, the “defocus” Zernike polynomial allows improved co-alignment in the axial direction.

The tweezer depths are set to  $\sim 1 \text{ mK}$  for Rb and  $\sim 1.8 \text{ mK}$  for Cs during loading, and lowered for state initialization into the  $|1\rangle_{\text{Rb}} = |F=2, m_F=0\rangle$  and  $|1\rangle_{\text{Cs}} = |F=4, m_F=0\rangle$  hyperfine clock states via  $\pi$ -polarized optical pumping. Single-qubit manipulations in the hf-manifold are performed using a home-built microwave horn [1]. Following pumping, for the interspecies measurements, we transfer the pairs of atoms to a third tweezer array generated by crossed acousto-optic deflectors (AODs) at 911.3 nm. While this co-trapping approach reduces sensitivity to any sub-micron-scale misalignment between the separate trapping arrays, it is not required for qubit operations in the strongly blockaded regime, which is robust to small positional fluctuations of the atoms. For same-species experiments, we load directly into the tweezer array generated by AODs.

The dual-species experiments are performed at a reduced trap depth of  $\sim 190 \mu\text{K}$  for Rb and  $\sim 460 \mu\text{K}$  for Cs. Tweezers are quenched off for up to  $3 \mu\text{s}$  during which the Rydberg pulses are fired. Atom temperatures during the drop are measured to be  $\sim 18 \mu\text{K}$  for Rb and  $\sim 30 \mu\text{K}$  for Cs via comparison with Monte Carlo simulations. If encoded in the gr-manifold, the ramping up of tweezers pushes out atoms in the Rydberg state. Otherwise, when encoded in the hf-manifold, the recapture is followed by a resonant state-selective pushout pulse. A subsequent fluorescence image reveals the final state configuration. Since the atoms

load stochastically with  $\sim 55\%$  loading efficiency in the array, we perform the single and paired atom experiments in parallel by post-selecting the data on individual and pair loading events. Figure S1 provides an overview of the experimental sequence.

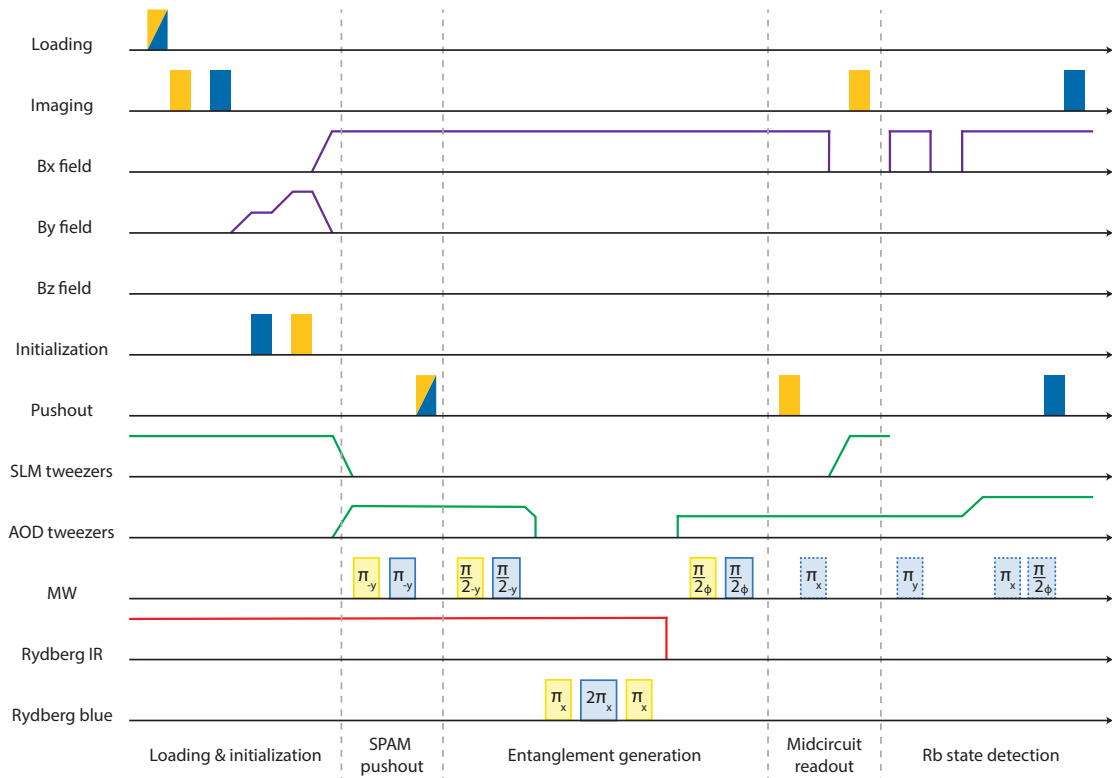

Fig. S1. **Experimental sequence.** In each experimental cycle, a dual-species magneto-optical trap is loaded for 30 ms from an atomic beam, followed by polarization-gradient cooling [2]. After loading into species-selective tweezer arrays, atoms trapped in weak out-of-plane SLM traps are removed using a pushout pulse. Atoms are then initialized into  $|1\rangle_{\text{Rb}} = |F=2, m_F=0\rangle$  and  $|1\rangle_{\text{Cs}} = |F=4, m_F=0\rangle$  via  $\pi$ -polarized optical pumping. The magnetic fields are adiabatically ramped from the pumping quantization field  $B_y$  to the Rydberg quantization field  $B_x$  to preserve qubit population, and atoms are transferred into common-mode AOD tweezers. MW-pulses then flip the qubits from  $|1\rangle$  to  $|0\rangle$  to “hide” the  $|1\rangle_{\text{Rb}}$  and  $|1\rangle_{\text{Cs}}$  populations, and a resonant pulse pushes out atoms initialized in the incorrect  $m_F$  states. This converts state preparation errors to raw loss. For generating entanglement, the tweezers are switched off, and the ‘ $\pi$ - $2\pi$ - $\pi$ ’ protocol [3] is applied by pulsing the blue lasers of the Rydberg transitions for both species. Finally, atoms are recaptured, and the qubit state is mapped to atom presence in the array. If required, MCR of Cs qubits is performed while dynamically decoupling Rb (dashed MW pulses). This includes quenching of the B-field and application of a pinning field from the Cs SLM tweezers during fluorescence.

The trapping light for the two species is generated by independent M Squared SolsTiS systems, and shared with the Rydberg laser system to generate the blue wavelengths required for the respective two-photon Rydberg transitions (see Sec. 3). After the degradation of the 840.6 nm laser, a Sirah Matisse C was introduced for trapping Rb. Additionally, due to fluctuations in the laboratory conditions which affected loading and loss statistics, the sequences for Figs. 3, 4 were optimized on an array of 3 pairs of atoms (the left-hand side of the array shown in Fig. 1a). Due to laser degradation during the final measurement (Fig. 4e), the sequence was optimized on a single pair.

## 2. Midcircuit readout

To facilitate quantum non-demolition measurement of the Rb atoms, we perform midcircuit readout of the Cs atoms. Readout of the hyperfine qubit state is performed by state-selective pushout followed by the collection of atomic fluorescence on an electron-multiplying charged coupled device camera (Andor IXON 888). For typical readout, atoms are fluoresced for 15 ms. For the MCR, however, this is reduced to 7 ms so that the Rb qubits can be decoupled on a faster timescale. The quantization field is quenched from  $\sim 6.65$  G to  $\sim 0.16$  G, and the Cs SLM tweezers are ramped up to  $\sim 0.9$  mK to provide a pinning field. The magnetic field is quenched high and low again, and interwoven into an XYX sequence so that any coherent deleterious effects on the Rb qubits can be decoupled away (Fig. S1). To account for the time required for coil ring-down, the interpulse delay is set to  $\sim 20$  ms. An example fluorescence histogram is provided in Fig. 4c. We measure the discrimination fidelity [1] to be 0.990(3).

### 3. Rydberg lasers

Rydberg states are accessed using a two-photon excitation scheme, as depicted in Fig. S2. For each species, the blue light is generated by a frequency-doubling process using a Second Harmonic Generation (SHG) cavity. For the Cs  $6S_{1/2} \leftrightarrow 7P_{3/2}$  transition, 911.3 nm light is split from the laser used for Cs optical trapping, and converted to 455.7 nm with an M Squared ECD-X SHG. For Rb  $5S_{1/2} \leftrightarrow 6P_{3/2}$ , a SolsTiS pumped by an M Squared Equinox generates 840.6 nm light which is doubled to 420.3 nm using an Agile Optics SHG. For the infrared transitions, a SolsTiS pumped by a Spectra-Physics Millennia eV produces 1013.0 nm light for Rb  $6P_{3/2} \leftrightarrow 68S_{1/2}$ , and a Precilasers YFL-SF-1059 fiber seed along with a fiber amplifier produces 1060.2 nm light for Cs  $7P_{3/2} \leftrightarrow 67S_{1/2}$ .

Phase stability of the Rydberg lasers is necessary to perform coherent Rydberg operations on the atoms, and is achieved using the Pound-Drever-Hall (PDH) technique [4]. An ultra-low expansion (ULE) cavity from Stable Laser Systems (finesse  $>10,000$ , free spectral range 1.5 GHz) serves as a high-stability frequency reference for all four lasers, as shown in Fig. S3. Because the cavity is anti-reflection coated for infrared wavelengths, the pre-SHG fundamentals are used for locking instead of the blue light. These two lasers use a standard PDH setup:  $\sim 20$  MHz phase modulation is applied using a resonant Electro-Optic Modulator (EOM) (Qubig PM7-NIR), and the reflected light from the cavity is measured on a fast photodiode. This signal is demodulated to create an error signal, which is sent through a PID controller (Vescent D2-125) and fed back to the lasers to correct frequency deviations. Since the ULE cavity only has resonances at fixed frequencies, valid lockpoints are spaced by the free spectral range, 1.5 GHz. After frequency-doubling, the blue lasers can be set in 3 GHz increments, leading to the choice of intermediate state detunings of  $\Delta_{\text{Rb}} = 2.34$  GHz and  $\Delta_{\text{Cs}} = -1.27$  GHz. The two infrared lasers additionally use an ‘offset’ PDH locking technique [5]. Instead of using a resonant EOM and modulating the lasers at one frequency, a broadband EOM (EOSPACE PM-0S5-05-PFA-PFA-106) is used and two modulation frequencies are applied: one at 20 MHz to create the error signal, and one adjustable from 20-730 MHz to create the offset. Scanning the offset enables frequency scanning of the laser for spectroscopic measurements (Fig. 2).

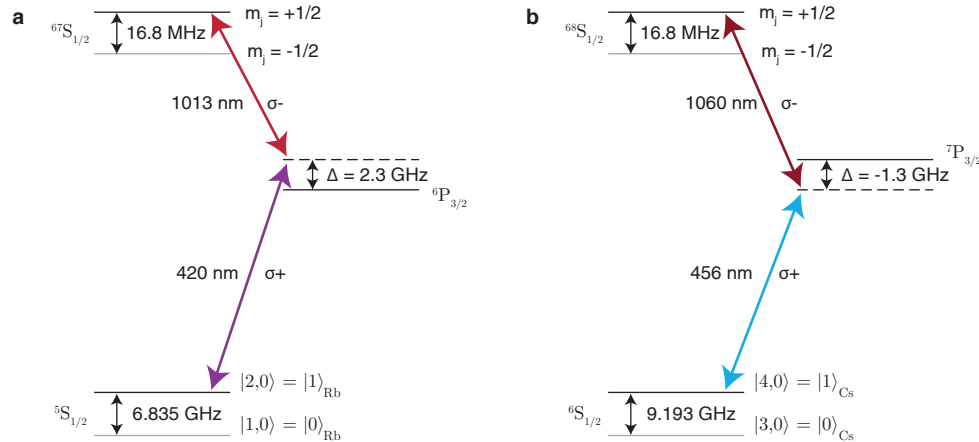

Fig. S2. **Two-photon Rydberg excitation.** Coherent Rydberg excitation of **a**, Rb and **b**, Cs is performed through a two-photon process using a blue and an infrared laser. Choice of intermediate state detuning is limited by available optical cavity lockpoints (spacing 3 GHz, after frequency doubling); the values of 2.3 GHz and -1.3 GHz are large enough to mitigate off-resonant scattering but small enough to achieve reasonable two-photon Rabi frequencies of 2.38 MHz and 1.86 MHz, respectively. The Rydberg states are split into two levels with an applied magnetic field of  $\sim 6.65$  G, enabling the selection of the  $m_j = 1/2$  state via laser frequency. The choice of polarization ( $\sigma_+$ ,  $\sigma_-$ ) further suppresses coupling to  $m_j = -1/2$  by a factor of 3 due to Clebsch-Gordan coefficients.

Fig. S4 depicts how the Rydberg lasers are delivered to the atoms. Each Rydberg beam has an acousto-optic modulator (AOM) in a noise-eater configuration to reduce intensity fluctuations on the atoms to below 1%. During experimental sequences, a sample-and-hold signal is sent to the servos controlling the AOMs, enabling pulses faster than the response time of the servo loop. The Rydberg lasers are focused into the vacuum cell, resulting in waist sizes of  $\sim 30$ -100  $\mu\text{m}$  on the atoms, based on observed variations in Rabi frequencies across different rows in a large array. Additionally, we apply UV light (365 nm, Thorlabs M365LP1) to the glass cell to stabilize the electric field environment [6].

The four Rydberg beams are independently aligned onto the atoms by maximizing the differential Stark shift induced on qubits encoded in the hf-manifold in Ramsey-style measurements. Using the measured AC Stark shifts from the blue legs, we extract the single-photon Rabi frequencies  $\Omega_{420}$  and  $\Omega_{456}$  taking into account the underlying hyperfine structure of the respective  $6P_{3/2}$  and  $7P_{3/2}$  manifolds for Rb and Cs [7]. We then extract the infrared single-photon Rabi frequencies,  $\Omega_{1013}$  and  $\Omega_{1060}$ , using the measured two-photon Rabi frequencies and intermediate state detunings. A representative set of values can be found

in Table S2 (Sec. 11), taken during the hyperfine entanglement measurements.

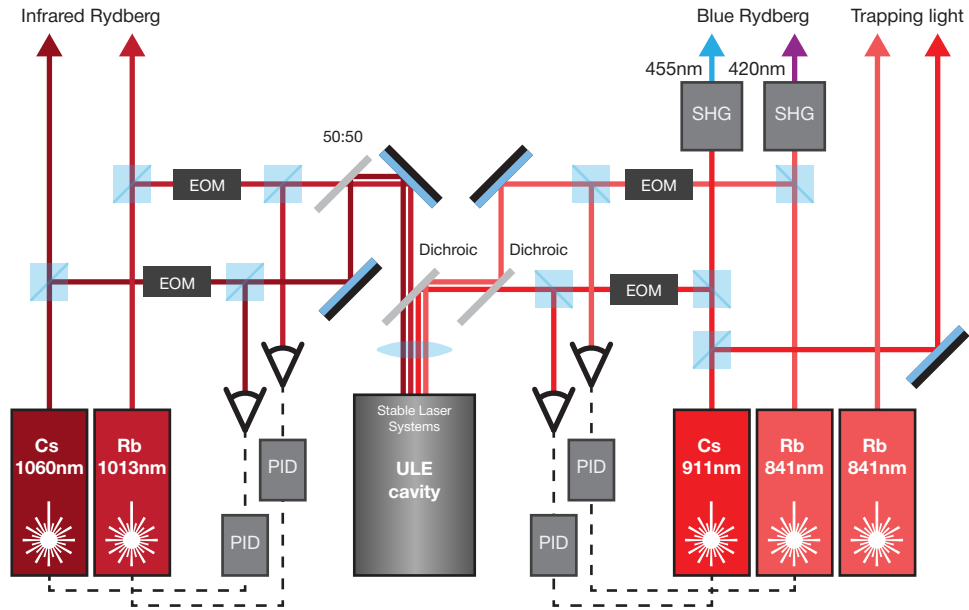

Fig. S3. **PDH locking setup.** Infrared Rydberg lasers (1060 nm and 1013 nm) and the fundamentals of blue lasers (911 nm and 841 nm) are simultaneously locked to a single ultra-low expansion cavity. Using the Pound-Drever-Hall technique, each laser is referenced to a high-stability cavity resonance, enabling narrow linewidths and phase coherence between all four Rydberg lasers. Both infrared lasers use an offset locking technique, and continuous tuning of the two-photon frequency is achieved by scanning the offset. Beam displacements are exaggerated in the diagram, and waveplates are omitted for clarity.

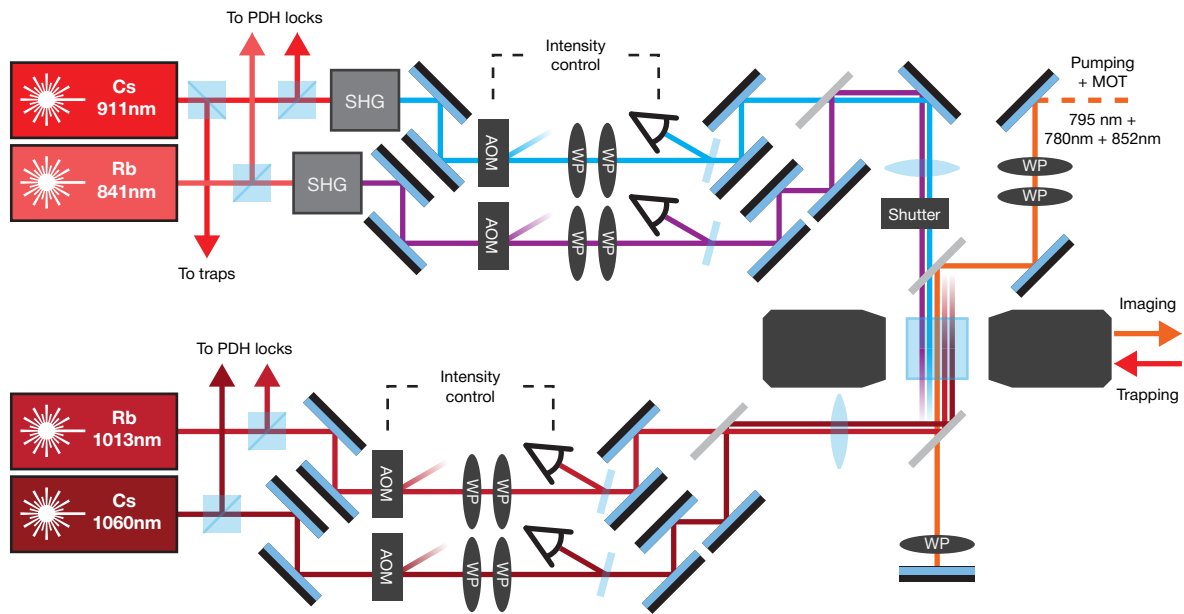

Fig. S4. **Rydberg laser optical layout.** Simplified schematic for the delivery of all four Rydberg lasers to the atoms. Each laser uses an AOM in a noise-eater configuration to suppress intensity noise to  $<1\%$ ; these AOMs are also used for creating optical pulses during experimental sequences. Dichroics combine beam paths for delivery along the quantization axis, and waveplates (WP) are used to control polarization for the ( $\sigma_+$ ,  $\sigma_-$ ) excitation. Beams are steered between the wires of the Faraday cage, and alignment is verified on an array of atoms.

#### 4. Electric Field Control

Electric field control in the experiment is provided by six electrically-isolated field plates, shown in Fig. 1a of the main text. The field plates are constructed from gold-coated 316L stainless steel and form a rectangular box with outer dimensions  $17 \text{ mm} \times 27.3 \text{ mm} \times 53.3 \text{ mm}$ . In-vacuum copper wires individually connect each field plate to a multi-pin instrumentation feedthrough, allowing for external application of voltages to each of the in-vacuum field plates. This enables the set of field plates to act as a Faraday cage when all field plates are grounded, and as a set of electrodes for the creation of arbitrary electric fields on arrays of atoms. The apertures in the field plates enable optical access for laser light and high NA imaging with microscope objectives. Each aperture is covered in  $15 \text{ }\mu\text{m}$  diameter gold wire spaced by  $0.5 \text{ mm}$  for increased electric field suppression and greater electric field homogeneity when applying electric fields.

#### 5. Elimination of Static Electric Field

Stray electric fields at the position of the atoms are eliminated by applying voltage differences ( $V_x$ ,  $V_y$ , and  $V_z$ ) between pairs of field plates along the  $x$ ,  $y$ , and  $z$  directions and measuring the quadratic Stark shifts on excited Rydberg states. Figure S5 illustrates our procedure using  $|67S_{1/2}\rangle_{\text{Cs}}$ . The resulting Stark shifts are used to determine the voltage differences that give the minima of the quadratic energy shifts, corresponding to a minimized electric field.

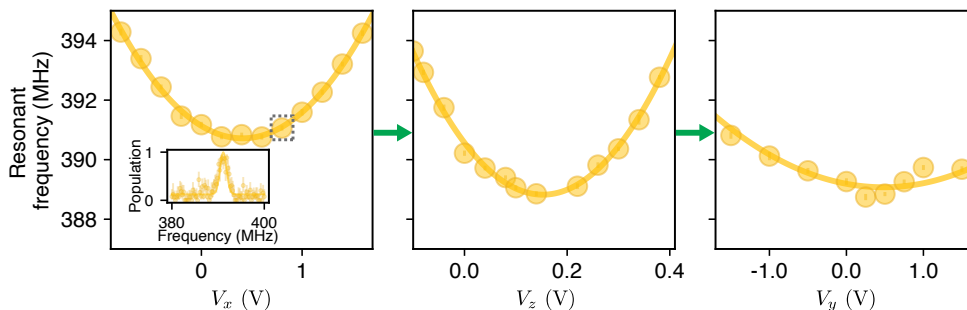

Fig. S5. **Cancellation of electric fields.** Environmental electric fields are nulled out using the field plates. A voltage difference  $V_x$  is applied between the two field plates along the  $x$ -direction to produce a quadratic Stark shift of  $|67S_{1/2}\rangle_{\text{Cs}}$  (left plot). The frequency of the 1060 nm laser is scanned with an EOM to locate the shifted Rydberg resonance. The laser is locked to the negative order of the EOM such that increasing EOM frequency corresponds to a reduction in the laser frequency. The minima of the potentials above correspond to a reduced electric field at the position of the atoms and a maximization of the energy of the Rydberg state. After locating the voltage difference  $V_x$  that produces the minimal Stark shift on the atoms along the  $x$ -direction, we proceed to the  $z$  (middle plot) and  $y$  (right plot) directions. The inset in the first panel shows an example resonance scan of the Rydberg population as a function of the EOM frequency for the data point in the grey dashed box. These resonances are fit to Gaussian profiles to extract the center frequency. Error bars of the main panels are statistical fit uncertainties.

The parabolic curves in Fig. S5 are fit to the following functional form:  $E(v) = A(v - V_0)^2 + B$ , where  $A$ ,  $B$ , and  $V_0$  are fitting parameters and  $v$  is the applied voltage difference. The extracted fit parameters are shown in Table S1 for each of the three dimensions.

| Fit parameter             | $x$                 | $y$                 | $z$                 |
|---------------------------|---------------------|---------------------|---------------------|
| $V_0$ (V)                 | $0.408 \pm 0.006$   | $0.337 \pm 0.119$   | $0.153 \pm 0.002$   |
| $A$ (MHz/V <sup>2</sup> ) | $2.495 \pm 0.042$   | $0.533 \pm 0.109$   | $74.750 \pm 1.698$  |
| $B$ (MHz)                 | $390.716 \pm 0.037$ | $389.093 \pm 0.121$ | $388.823 \pm 0.060$ |

Table S1. **Fitting of electric field cancellation measurements.** Fit parameters extracted from parabolic fits of the quadratic Stark shifts in Fig. S5.

The results from these fits can be compared to the quadratic Stark shift Hamiltonian to extract estimates for the applied electric field as a function of the experimentally applied voltage differences and to determine an estimate of the initial background electric field prior to nulling. The Stark shift Hamiltonian is given by  $H = -\frac{1}{2}\alpha E^2$ , where  $\alpha$  is the polarizability of the  $67S_{1/2}$  state of Cs and is calculated to be  $465.717 \text{ MHz cm}^2/\text{V}^2$  using the Alkali Rydberg Calculator [8]. From our comparisons, we determine

that the applied electric fields as a function of the applied voltage differences  $V_x$ ,  $V_y$  and  $V_z$  (in Volts) are approximately:

$$\begin{aligned} E_x &= a_x V_x, \text{ where } a_x = 0.1035 \pm 0.0009 \text{ cm}^{-1} \\ E_y &= a_y V_y, \text{ where } a_y = 0.048 \pm 0.005 \text{ cm}^{-1} \\ E_z &= a_z V_z, \text{ where } a_z = 0.567 \pm 0.006 \text{ cm}^{-1}. \end{aligned} \quad (\text{S1})$$

From these equations, we determine that the initial electric field on the atoms prior to nulling is  $\vec{E}_{\text{initial}} = (E_x, E_y, E_z) = (-0.0423 \pm 0.0007, -0.016 \pm 0.006, -0.087 \pm 0.001)$  (V/cm), corresponding to a total electric field of  $|\vec{E}_{\text{initial}}| = 0.098 \pm 0.002$  V/cm. The electric field is largest along the  $z$ -direction, which corresponds to the pair of field plates with the largest apertures and consequently the lowest suppression of external electric fields. From the measured rms voltage noise of 3.5 mV on our voltage control lines, we further determine that we are able to zero out electric fields at the position of the atoms to better than 6 mV/cm.

## 6. Effect of Static Electric Fields on Förster Interaction

Static electric fields strongly affect interspecies Förster interactions. To illustrate this, we plot in Fig. S6 the energy eigenvalues arising from excitation to  $|68S_{1/2}\rangle_{\text{Rb}} |67S_{1/2}\rangle_{\text{Cs}}$  as a function of the separation between the atoms (using the Pairinteraction software [9]). We plot two versions of the interaction: one with zero electric field (in pink) and one with the measured initial electric field  $\vec{E}_{\text{initial}}$  prior to nulling (black). The colormaps indicate the overlap of the eigenstates with the non-interacting pair state. With the presence of the  $\sim 0.1$  V/cm electric field, the interaction between the two dominant eigenstates of the near-resonant Förster pair collapse into a weaker, shorter-length interaction shown by the black curve.

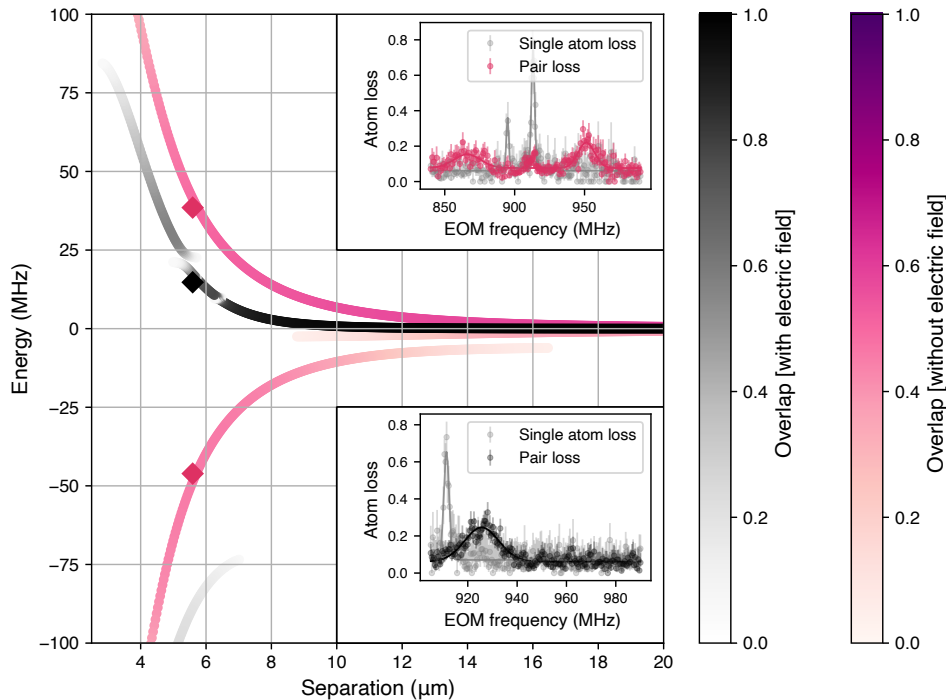

Fig. S6. **Effect of  $\vec{E}_{\text{initial}}$  on Förster resonance.** Interactions resulting from the Förster resonance are strongly affected by background electric fields, necessitating cancellation. The pink curves show the dominant eigenstates of the near-resonant Förster interaction arising from excitation to  $|68S_{1/2}\rangle_{\text{Rb}} |67S_{1/2}\rangle_{\text{Cs}}$  with zero electric field and a bias magnetic field of  $\sim 6.65$  G along the interatomic axis. The black curves show the same system, but with an electric field corresponding to the initially measured electric field  $\vec{E}_{\text{initial}}$  prior to cancellation. The colormaps show the overlap of the energy eigenstates with the non-interacting pair state. The black diamond data point indicates the measured interaction strength of 14.3(3) MHz at a distance of 5.6  $\mu\text{m}$  prior to nulling of the electric field. The associated bottom inset shows the measured pair-excitation resonance (black) for this point and the non-interacting Rb Rydberg resonance (grey) as a function of the EOM frequency on the 1013 nm laser. After nulling the electric field, we measure two pair-excitation resonances shown by the red diamond data points. The associated top inset shows the measured pair-excitation resonances (pink) for these points and the non-interacting Rb Rydberg resonances (grey).

## 7. Extraction of $C_6$ and $C_3$ Coefficients

The interatomic separation is first estimated by imaging the tweezer arrays using a second 0.65 NA microscope objective onto an sCMOS camera (Thorlabs CS165MU). As discussed in the main text, we then opt to use the theoretically calculated values of same-species  $C_6$  coefficient to calibrate the interatomic spacing. This is due to the availability of experimentally verified numerical tools for same-species interactions [9], as well as the isotropy and robustness of the van der Waals interactions to electric field noise.

Theoretical values of the  $C_6$  coefficients for the Rb-Rb, Cs-Cs, and Rb-Cs van der Waals interactions and the  $C_3$  coefficient for the Rb-Cs Förster interaction are calculated using the Pairinteraction software [9] at a bias magnetic field of 6.65 G along the interatomic axis. The  $C_6$  coefficients are determined by fitting both the theoretical and experimental values for the van der Waals interaction strength  $V(R)$  to the function  $V(R) = C_6/R^6$  to make a direct comparison. The experimental values of the intraspecies van der Waals interactions are measured by applying a 5  $\mu$ s Rydberg laser pulse on the atoms and fitting the resulting two-atom loss events as a function of laser frequency to the sum of two Voigt profiles (corresponding to the two-photon bare resonance and the four-photon resonance to the doubly excited state). For this four-photon resonance process we extract the interaction strength via the relation  $\Delta E = V/2$  [10].

The corresponding energy shifts are provided in Fig. 2e. The extracted  $C_6$  coefficients are compared to the theoretical counterparts and used to rescale the distances measured from tweezer images. We observe a 2% discrepancy between the measured and calibrated distance values. The source of this discrepancy could be the imperfect  $C_6$  values extracted from the fitted energy shift data. The observed resonance features are broadened at short distances due to shot-to-shot fluctuations of the atom position [10, 11], and start to overlap at large distances due to decreasing interaction strength, making the fitting procedure challenging near the extrema values. Experimental precision could be improved in future work by reducing the Rabi frequency and performing ground-state cooling.

The theoretical value of the  $C_3$  coefficient for the Rb-Cs Förster pair is determined by taking the difference in energy between the two eigenstates with largest overlaps with the initial non-interacting pair state and fitting the result to  $V(R) = \delta(1 + C_3/(\delta^2 R^3))$ , where  $\delta$  is the Förster defect. The analogous experimental value of the  $C_3$  coefficient is determined by taking the difference in energy between the measured pair of resonances and fitting the result to the same functional form. These  $C_3$  values are also affected by the aforementioned fitting challenges. Additional discrepancies between the theoretical and experimental  $C_3$  coefficients can arise from a residual angle ( $< 2^\circ$ ) between the quantization magnetic field and the interatomic axis [9].

Alongside the  $C_3$  and  $C_6$  values quoted in the main text, we extract the Förster defect for  $|68, 67\rangle_{\text{Rb, Cs}}$  to be 10(1) MHz, in agreement with the value of 9.0(2) MHz predicted by Pairinteraction for our bias field of  $\sim 6.65$  G [9].

## 8. Choice of Rydberg states for Förster physics

### 8.1. Rydberg interaction landscape

Here we motivate the choice of Rydberg states used in our experiments. We focus on states which exhibit asymmetry between inter:intra-species interactions, which we will capture by an asymmetry parameter:

$$\zeta = \frac{V_{\text{Rb-Cs}}}{\sqrt{V_{\text{Rb-Rb}} V_{\text{Cs-Cs}}}}, \quad (\text{S2})$$

where  $V_{i-j}$  denotes the interaction strength between a pair of atoms of species  $i, j$  for some choice of Rydberg states, interatomic distance ( $R$ ), electric and magnetic field, and orientation of the interatomic axis with respect to the quantization axis (which we set as  $\theta = 0$  throughout this discussion). A large asymmetry parameter could be leveraged for mediated multi-qubit gate protocols and many-body physics [12].

As discussed in the main text, asymmetry arises due to the existence of Förster resonances [13]. Rydberg-Rydberg interactions occur through atomic transition dipole moments which couple opposite parity states. At interatomic spacings  $> 3\text{-}4 \mu\text{m}$ , the pair-state eigenvectors of the interaction dipole-dipole Hamiltonian are typically far detuned from the bare (non-interacting) pair-state, which results in a second-order van der Waals interaction: the bare pair-state is a good eigenstate of the interaction Hamiltonian, but has a shifted eigenenergy [13]. However, when there coincidentally exists another nearly degenerate pair-state, a resonant dipole-dipole interaction re-emerges.

For pairs of atoms of the same species excited to identical  $S$ -states — a class of states accessible by our global two-photon excitation scheme — Förster resonances are not predicted. However, such resonances *are* predicted when considering interspecies combinations with differing principle quantum numbers [14]. Near a resonance, the relative  $1/R^3$  scaling of the interspecies dipole-dipole interaction compared to the  $1/R^6$  of the intraspecies vdW interaction causes asymmetry to increase with increasing  $R$ .

To identify Rydberg states which maximize asymmetry properties, we use the open-source Pairinteraction Python software package [9] to calculate the interaction strengths  $V_{i-j}$  for various combinations of Rydberg states of the form  $|n_{\text{Rb}}S_{1/2}, n_{\text{Cs}}S_{1/2}\rangle := |n_{\text{Rb}}, n_{\text{Cs}}\rangle$ , where  $n$  denotes the principal quantum number. The magnetic quantum numbers of the chosen pair state influence the resonant interaction strength up to an angular factor [14]. Here, we work with the total magnetic quantum number  $m=1$ . We focus on states around the value  $n=70$ , as this is the range accessible with our 1060.2 nm fiber laser. This range was chosen as it enables a sizeable  $\zeta$  while maintaining a reasonable blockade radius for ease of array generation. We note that, given the relative scaling of each interaction type with principle quantum number (dipole-dipole:  $\propto n^4$ , vdW:  $\propto n^{11}$ ) asymmetry generally increases at lower  $n$ . While omitted from the analysis here, we have thus identified the states  $|46, 48\rangle_{\text{Rb, Cs}}$  and  $|48, 51\rangle_{\text{Rb, Cs}}$  of interest for future work. These states would enable significant asymmetry ( $\zeta > 15$ ) at distances close to 4  $\mu\text{m}$ .

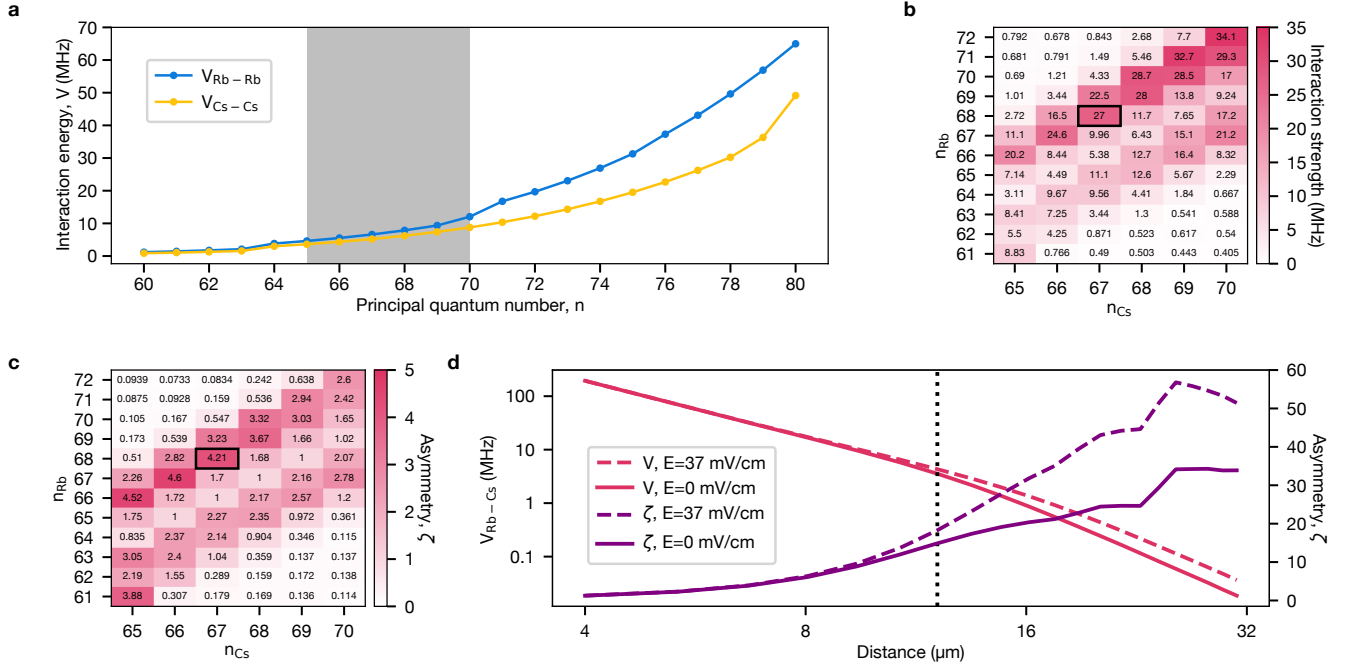

Fig. S7. **Rydberg state landscape for quantum information processing.** **a**, Theoretically calculated intraspecies interaction strengths at 6.65 G external magnetic field. The van der Waals interaction at an interatomic spacing of 7  $\mu\text{m}$  is plotted for various principal quantum numbers of Rb (blue) and Cs (yellow), where the interaction is between atoms excited to states  $|nS_{1/2}, m_j = 1/2\rangle$ . The shaded region shows the range of experimentally accessible Cs states. **b**, The interspecies Rb-Cs interaction strength at  $B = 6.65$  G for the principal quantum numbers of Cs shown in the shaded region in panel a. The state highlighted in the black box is  $|68, 67\rangle_{\text{Rb, Cs}}$  which is used for the experiments in the main text. **c**, The asymmetry parameter at zero field as calculated using Eq. S2. The highlighted box shows the state with maximal asymmetry chosen for our experiments. **d**, Stark tuning of the Rb-Cs interaction strength. The asymmetry parameter at electric fields of 0 and 37 mV/cm is plotted on the twin axis. The dotted vertical line at 12.1  $\mu\text{m}$  indicates the crossover radius beyond which the interaction transitions from a  $1/R^3$  scaling to a  $1/R^6$  potential.

## 8.2. Numerical studies

For the range of  $n$  levels studied, we evaluate the interactions at a spacing of 7  $\mu\text{m}$ . Here we expect interspecies interactions on the order of 10 MHz, which gives strong Rydberg blockade for ground-Rydberg Rabi frequencies of  $\sim 1$ -2 MHz where good coherent control can be achieved. We perform our calculations considering the 6.65(3) G bias field and assume that the background electric field is nulled using the Faraday cage electrodes. In general, Förster resonances are sensitive to both fields, and the exact asymmetry parameter will depend on how well the choice of fields suppresses the energy defect between the near-degenerate pair states [15]. In our analysis, we define the interaction strength between two Rydberg atoms in an initial pair state  $|\psi\rangle$  as:

$$V_{i-j} = \sum_{\phi} |\langle \phi | \psi \rangle|^2 |U_{\phi}| \quad (\text{S3})$$

where  $U_\phi$  is the energy shift of the new eigenstates  $\phi$  of the system and the summation is taken over all such eigenstates. This is a reasonable proxy for the probability of double Rydberg excitations in a pair of atoms, i.e. it gives an estimate of the blockade strength.

Figure S7a presents the scaling of  $V_{\text{Rb-Rb}}$  and  $V_{\text{Cs-Cs}}$  with  $n$ , showing the expected polynomial dependence. In Fig. S7b we plot  $V_{\text{Rb-Cs}}$  for the range of accessible Cs states. The principal quantum numbers of Rb are restricted to those for which there exists a nearby Rydberg-pair state with an energy defect in the 10 MHz range. Taking these values, we evaluate the asymmetry parameter as defined in Eq. S2 (Fig. S7c). We can see clearly that for the state  $|68, 67\rangle_{\text{Rb, Cs}}$  the asymmetry parameter is near maximal within the range considered, and gives a stronger blockade strength than  $|67, 66\rangle_{\text{Rb, Cs}}$ .

As an outlook, we finally consider the enhancement of asymmetry at larger distances by electrical tuning of the  $|68S_{1/2}, 67S_{1/2}\rangle_{\text{Rb, Cs}} \leftrightarrow |67P_{1/2}, 67P_{3/2}\rangle_{\text{Rb, Cs}}$  Förster resonance to degeneracy. Numerically, we find that this can be achieved by inverting the magnetic field such that  $B_z = -6.65$  G, and then applying a small electric field of  $E_z = 37$  mV/cm. Figure S7d shows  $V_{\text{Rb-Cs}}$  and  $\zeta$  as a function of distance, both with and without the application of the electric field. At zero electric field, the interaction scales as  $1/R^3$  at small spacings up to a crossover radius of  $\sim 10$   $\mu\text{m}$ . At spacings larger than the crossover radius the interaction falls off as  $1/R^6$ , as  $V_{\text{Rb-Cs}} < \delta$ , the Förster defect. Under application of the electric field, the interaction is tuned to resonance ( $\delta \rightarrow 0$ ) and the inverse cubic scaling extends further. One would expect that, after tuning, the asymmetry would continue to scale polynomially with distance. However, for this choice of state, an interesting feature is that the initial pair state can dipole couple to superposition states of  $|m_j = 1/2, m_j = 1/2\rangle_{\text{Rb, Cs}}$  and  $|m_j = -1/2, m_j = 3/2\rangle_{\text{Rb, Cs}}$ . One superposition results in a strong  $1/R^3$  interaction, but the other superposition is minimally interacting at short distances [11]. At larger distances, the Zeeman effect is typically dominant over the Rydberg-Rydberg interaction. This effectively reduces the blockade strength at larger distances. For future work targeting large asymmetry, a judicious choice of pair state (e.g a Förster resonance that couples two  $|j = 1/2, j = 1/2\rangle_{\text{Rb, Cs}}$  states) can avoid this effect. One such case is predicted for  $|59, 57\rangle_{\text{Rb, Cs}}$ .

## 9. SPAM correction

In this work, we build on methods described by McDonnell et al. [16] and Ma et al. [17] to develop a robust method for the correction of state-preparation and measurement (SPAM) errors that occur during our Bell state generation and characterization circuit. Our approach is based on two key concepts: (1) the conversion of state preparation errors to atom loss and (2) the mapping of Bell state characterization observables onto ‘bright-bright’ measurement outcomes. With high probability, this approach captures experimental runs in which two atoms were loaded into a given gate site, were prepared in the desired hyperfine state, survived the gate protocol (including the transfer between the ‘loading’ and ‘science’ arrays), and ended in a particular hyperfine basis state  $|j, k\rangle$ , ( $j, k \in \{0, 1\}$ ). We then use a separate characterization circuit — in which the single-qubit MW gates, the tweezer off-time, and the Rydberg laser pulses are omitted — to capture the base probability of loading two atoms, preparing the desired initial state, and successfully transferring between the loading and science arrays. By normalizing the measurement outcomes by this base probability, we can evaluate the two-qubit gate fidelity in the absence of SPAM errors.

### 9.1. Conversion of state-preparation errors to atom loss

After loading, atoms are optically pumped into the states  $|1\rangle_{\text{Rb}}$ ,  $|1\rangle_{\text{Cs}}$ . Due to nonidealities in this process (e.g. residual vector light-shifts, polarization impurity, magnetic field noise), and loss processes (from the initial image, the transfer between trapping arrays, and background gas collisions), the resulting state of each atom is:

$$\rho_{\text{pump}} = p_g |1\rangle \langle 1| + \sum_{m \neq 0} p_{e,m} |F, m\rangle \langle F, m| + p_l |l\rangle \langle l|. \quad (\text{S4})$$

Here,  $p_g$  is the success (‘good’) probability,  $p_e = \sum_m p_{e,m}$  is the ‘erroneous’ ( $F = \{2, 4\}$ ,  $m_F \neq 0$ ) population, and  $p_l$  captures loss ( $|l\rangle$  is the ‘loss’ state). We assume that repump light applied after optical pumping removes all population in the Rb  $F = 1$  and Cs  $F = 3$  hyperfine states. To remove the contributions of unpumped atoms ( $p_e$ ) to the circuit dynamics, we convert this population to loss (erasure). A microwave  $\pi$ -pulse converts  $|1\rangle_{\text{Rb}}$  and  $|1\rangle_{\text{Cs}}$  to  $|0\rangle_{\text{Rb}}$  and  $|0\rangle_{\text{Cs}}$ , before the  $F = 2$  and  $F = 4$  manifolds are pushed out with high probability (Rb: 0.99(1), Cs: 0.97(1)). We refer to this process as state-preparation pushout (‘SP-pushout’). Up to small  $\pi$ -pulse errors which would slightly reduce  $p_g$ , the resulting state is ideally:

$$\rho_{\text{init}} = p_g |0\rangle \langle 0| + p_L |l\rangle \langle l|, \quad (\text{S5})$$

with  $p_L = p_l + p_e$ .

We note that there is a small probability for atoms to survive pushout. In this case, we assume that the atoms are distributed in the  $F = \{1, 3\}$ ,  $m_F \neq 0$  states, and undergo minimal further dynamics as the microwave- and Rydberg-transitions are

far-detuned. We instead have:

$$\rho'_{\text{init}} = p_g |0\rangle \langle 0| + p_s p_e |a\rangle \langle a| + p_{L'} |l\rangle \langle l|. \quad (\text{S6})$$

where  $|a\rangle$  denotes ‘atom present’, i.e. population which will contribute to the final fluorescence measurement. In practice, with  $p_e \sim 5 - 10\%$  and  $p_s \sim 1 - 3\%$ , the population of  $|a\rangle$  should remain  $\ll 1\%$ . SP-pushout is used in all measurements presented in Figs. 3 and 4 of the main text, but not in Figs. 1 and 2.

### 9.2. Mapping measurement bases to ‘bright, bright’

We now turn to Bell state characterization via ‘bright, bright’ measurements. The state-preparation circuit (Fig. 4b of the main text, up to dashed line) ideally creates the canonical Bell state  $|\Psi^+\rangle = \frac{1}{\sqrt{2}}(|0_{\text{Cs}}, 0_{\text{Rb}}\rangle + |1_{\text{Cs}}, 1_{\text{Rb}}\rangle)$ , up to a Cs single-qubit phase, which can be compensated in later operations. Hereafter we will drop the subscript notation for the atomic species, and will maintain the ordering Cs, Rb. The fidelity of the prepared state can be evaluated via the relation  $\mathcal{F}_{\text{Bell}} = (P_{00} + P_{11} + P_c)/2$ , where  $P_{00}$  and  $P_{11}$  are the populations for the observables  $\mathcal{O}_{00} = |0, 0\rangle\langle 0, 0|$  and  $\mathcal{O}_{11} = |1, 1\rangle\langle 1, 1|$ , and  $P_c$  captures the Bell state coherences, given by the observable  $\mathcal{O}_c = |0, 0\rangle\langle 1, 1| + |1, 1\rangle\langle 0, 0|$ .

At the end of the sequence, the spin-state  $|0(1)\rangle$  is converted to atom presence (loss). Thus,  $P_{00}$  manifests directly as the probability  $p_{\text{bb}}$  (‘bright, bright’), whereas mapping  $P_{11}$  to  $p_{\text{bb}}$  is achieved by applying additional  $\pi$ -pulses to both qubits prior to pushout. To obtain  $P_c$ , the observable  $\mathcal{O}_c$  must be mapped to  $\mathcal{O}_{00}$ , which is realized by applying  $\pi/2(\phi)$  pulses to both qubits. Specifically, in this case we measure a probability  $p_{\text{bb}}^c = \text{Tr}(U\rho U^\dagger \mathcal{O}_{00})$ , with  $U = \exp[-i\frac{\pi}{4}\sigma_{\phi,\phi}]$ , where  $\sigma_{\phi,\phi} = [\cos(\phi)\sigma_x^{\text{Cs}} + \sin(\phi)\sigma_y^{\text{Cs}}] + [\cos(\phi)\sigma_x^{\text{Rb}} + \sin(\phi)\sigma_y^{\text{Rb}}]$ .

Akin to Ref. [17], this can be related to the measurement of the observable:

$$\mathcal{O}_\phi = U^\dagger \mathcal{O}_{00} U = \frac{1}{4} \begin{bmatrix} 1 & -ie^{-i\phi} & -ie^{-i\phi} & -e^{-2i\phi} \\ ie^{i\phi} & 1 & 1 & -ie^{-i\phi} \\ ie^{i\phi} & 1 & 1 & -ie^{-i\phi} \\ -e^{2i\phi} & ie^{i\phi} & ie^{i\phi} & 1 \end{bmatrix}. \quad (\text{S7})$$

The coherences of the Bell state manifest in  $p_{\text{bb}}^c$  as the term oscillating with frequency  $2\phi$ , and the value  $P_c$  is given by 4A, where A is the amplitude of that oscillating term (Fig. 4b of the main text).

### 9.3. Readout imperfections

Ideally, the raw Bell state fidelity would be found via  $\tilde{\mathcal{F}}_{\text{Bell}}^{\text{raw}} = (\tilde{P}_{00} + \tilde{P}_{11} + \tilde{P}_c)/2$ , where  $\tilde{P}_{ij}$  are the measured populations, giving a SPAM-corrected fidelity of  $\tilde{\mathcal{F}}_{\text{Bell}} = \tilde{\mathcal{F}}_{\text{Bell}}^{\text{raw}}/p_{\text{bb}}^{\text{SPAM}}$ , with  $p_{\text{bb}}^{\text{SPAM}}$  the probability to measure |bright, bright> after the gate-free SPAM characterization circuit. However, this picture can be complicated by read-out errors.

These fall under: (1) ‘discrimination’ errors; an atom is assigned as present (absent) when there is none (one), or (2) ‘mapping’ errors; either (a) an atom was left in  $|a\rangle$  after attempted erasure ( $P_a$ ), (b) an atom in the state  $|1\rangle$  survives the final pushout pulse ( $p_{\text{fp}}$ ), or (c) an atom is lost during the gate sequence or imaging. The discrimination fidelity of our standard (15 ms) imaging histograms is  $>0.999$ , and thus those errors have minimal impact. For mapping errors, atom loss will result in a reduction of  $p_{\text{bb}}$  (assigned as a gate error), but ‘false-positive’ events may lead to an overestimate.

To understand these effects, we modify the derivation of Ref. [17] to account for independent error rates for the two species, and for the residual population in  $|a\rangle$ ,  $P_a^{\text{Rb/Cs}}$ . This population will appear in measurements of both  $\tilde{P}_{00}$  and  $\tilde{P}_{11}$ , but not  $\tilde{P}_c$ , as  $P_a$  does not result in an oscillating signal. For small  $P_a$  and  $p_{\text{fp}}$ , keeping only first-order terms in them (and products thereof), we find the relationship between the underlying ( $P_{ij}$ ) and measured ( $\tilde{P}_{ij}$ ) populations:

$$P_{00} + P_{11} \approx \frac{(\tilde{P}_{00} + \tilde{P}_{11}) - (p_{\text{fp}}^{\text{Cs}} p_{\text{tp}}^{\text{Rb}} + p_{\text{tp}}^{\text{Cs}} p_{\text{fp}}^{\text{Rb}})}{(p_{\text{tp}}^{\text{Cs}} p_{\text{tp}}^{\text{Rb}} - p_{\text{tp}}^{\text{Cs}} p_{\text{fp}}^{\text{Rb}} - p_{\text{fp}}^{\text{Cs}} p_{\text{tp}}^{\text{Rb}} + p_{\text{fp}}^{\text{Cs}} p_{\text{fp}}^{\text{Rb}}} - 2(P_a^{\text{Cs}} + P_a^{\text{Rb}}), \quad (\text{S8})$$

$$P_c = \frac{\tilde{P}_c}{p_{\text{tp}}^{\text{Cs}} p_{\text{tp}}^{\text{Rb}} + p_{\text{fp}}^{\text{Cs}} p_{\text{fp}}^{\text{Rb}} - p_{\text{tp}}^{\text{Cs}} p_{\text{fp}}^{\text{Rb}} - p_{\text{fp}}^{\text{Cs}} p_{\text{tp}}^{\text{Rb}}}, \quad (\text{S9})$$

where  $p_{\text{tp}}, p_{\text{fp}}$  refer to true- and false-positive probabilities (namely atoms in  $|1\rangle$  which survived pushout). Note that the second term in Eq. S8 is an upper bound for the quantity  $(P_{0a} + P_{1a} + P_{a0} + P_{a1} + P_{aa})$ , i.e.  $(P_{00} + P_{11})$  is lower bounded.

The raw Bell state fidelity is lower-bounded by:

$$\mathcal{F}_{\text{Bell}}^{\text{raw}} = (P_{00} + P_{11} + P_c)/2 = \frac{(\tilde{P}_{00} + \tilde{P}_{11} + \tilde{P}_c) - (p_{\text{tp}}^{\text{Cs}} p_{\text{fp}}^{\text{Rb}} + p_{\text{fp}}^{\text{Cs}} p_{\text{tp}}^{\text{Rb}})}{2(p_{\text{tp}}^{\text{Cs}} p_{\text{tp}}^{\text{Rb}} + p_{\text{fp}}^{\text{Cs}} p_{\text{fp}}^{\text{Rb}} - p_{\text{tp}}^{\text{Cs}} p_{\text{fp}}^{\text{Rb}} - p_{\text{fp}}^{\text{Cs}} p_{\text{tp}}^{\text{Rb}})} - (P_a^{\text{Cs}} + P_a^{\text{Rb}}). \quad (\text{S10})$$

A further lower bound is found with both  $p_{\text{tp}} = 1$ . For our measured  $\tilde{\mathcal{F}}_{\text{Bell}}^{\text{raw}} = 0.49(2)$ , and our estimated values of  $p_{\text{fp}}^{\text{Cs}} = 0.03$ ,  $p_{\text{fp}}^{\text{Rb}} = 0.01$ , we predict a reduction of  $\mathcal{F}_{\text{Bell}}^{\text{raw}}$  by  $4 \cdot 10^{-4}$ . While the population in  $|a\rangle$  is not directly measurable in our experiment, a product of the raw pumping infidelity and the pushout error gives a simple estimate of  $P_a^{\text{Cs}} = 0.003$ ,  $P_a^{\text{Rb}} = 0.0005$ . The extracted, SPAM-corrected Bell state fidelity of  $\tilde{\mathcal{F}}_{\text{Bell}} = 0.69(3)$  is in good agreement with the prediction of our numerical model ( $\mathcal{F}_{\text{Bell}} = 0.73$ ), giving further confidence to the treatment made here. In future work targeting high-fidelity operations, rigorous gate fidelity estimates can be achieved using interleaved randomized benchmarking [18] or gate-set tomography [19].

#### 9.4. Mitigation of SP errors for blockade measurement

For the blockade measurement presented in Fig. 3b of the main text, state preparation errors on the Rb qubit will result in an absence of blockade. To mitigate this effect, we employ SP-pushout to convert SP errors to loss. After applying the variable time Cs drive, we apply a second  $\pi$ -pulse to the Rb qubit to de-excite it, and post-select the data on retention of the Rb atom. For the remainder of the measurements presented in Fig. 3 of the main text, post-selection is not performed.

#### 9.5. SPAM correction of eye diagrams

For the ‘eye diagram’ presented in Fig. 4a of the main text, SP-pushout is employed on both atomic species. The Cs qubit state is mapped to the bright state prior to measurement, such that the data can be post-selected on retention of the Cs atom. This largely suppresses the effects of SPAM errors on that qubit, allowing the reliable (post-selected) preparation of a chosen input state on the Cs atom. We then correct for SPAM errors on the Rb qubit using the fitted contrast of  $A = 0.872(14)$  obtained when applying the same sequence in the absence of the Rydberg light or the tweezer drop.

For the eye diagram presented in Fig. 4d, we apply the same correction process on the Rb qubit (again using  $A = 0.872(14)$ ), but the Cs qubit is prepared in a superposition state, resulting in a random measurement outcome. To suppress the effects of SP errors on the Cs qubit, we associate the state  $|0\rangle$  with ‘dark’, as both  $|0\rangle$  and atom loss correspond to scenarios in which blockade should not occur. The reduced contrast of Fig. 4d compared with Fig. 4a then results from two main factors.

First, the Rb qubit undergoes dephasing during the  $\sim 60$  ms time associated with MCR. This effect could be improved by reducing the MCR time (for example, imaging at high field using a single cycling imaging beam [20, 21] and using qCMOS camera technologies [22]). Second, the imperfect Cs pushout (0.97(1)) before the MCR results in projection errors on the Rb qubit, mapping it onto the opposite ( $\pi$ -out-of-phase) curve, which reduces the amplitude when averaging over the outcomes.

#### 9.6. SPAM correction of QND measurement

For the QND measurements (Fig. 4e of the main text), the Rb qubit state is mapped to the bright state prior to measurement, such that the data can be post-selected on retention of the Rb atom (reliably preparing a chosen input state). The best estimate for the QND readout fidelity is then given by correcting for SP errors on the Cs (auxiliary) qubit. We again employ SP-pushout, but, to remain agnostic to the input state on the data qubit, we do not change the Cs measurement based on the expected outcome (i.e. we do not add any additional  $\pi$ -pulses on Cs to enable post-selection on  $|\text{bright}, \text{bright}\rangle$  outcomes).

Immediately after taking the QND-measurement data, the Cs loss probability without application of the gate was measured to be  $P_{\text{SP}}^{\text{Cs}} = 0.22(2)$ . Correcting the data for the loss-probability associated with state preparation, we find:  $\mathcal{F}^{\text{SP}} = (1 - P_{\text{loss}})/(1 - P_{\text{SP}})$ . We thus find  $P(0|0) = 0.78(2)$ ,  $P(1|1) = 0.73(3)$ , as presented in the main-text.

We note that post-selection on retention of the Rb qubit suppresses error mechanisms of the two-qubit gate associated with loss of the Rb atom (e.g. loss due to the drop or an imperfect Rydberg  $2\pi$ -pulse), which might lead to an over-estimate in the fidelity of the auxiliary-based read-out. This effect only plays a role when the Rb qubit is in the  $|1\rangle$  state. Our numerical model predicts a SPAM-free  $P(1|1) = 0.788$  when post-selecting, or  $P(1|1) = 0.766$  without post-selection ( $P(0|0) = 0.775$  for both cases). The error-budget for this sequence is dominated by the Cs  $T_{2,\text{gr}}^*$ ; without this effect, we predict SPAM- and post-selection-free  $P(1|1) = 0.955$  and  $P(0|0) = 0.970$ .

## 10. QND-ness of auxiliary-based measurement

Alongside the ability of the auxiliary qubit to extract information from the data qubit, an important feature of an auxiliary-based measurement is that it preserves the data qubit state. To assess the QND-ness for the Rb atom, we evaluate the fraction of the data for which it was retained (i.e. survived SP-pushout, application of the gate, and the final measurement pushout) and compare this to the bare Rb atom loss in the absence of the QND-measurement sequence, which was found to be  $P_{\text{SP}}^{\text{Rb}} = 0.11(1)$  immediately after the taking of the data. That is, we evaluate  $P^{\text{QND}} = P_{\text{ret}} / (1 - P_{\text{SP}})$ . We find an average QND-ness  $P_{0/1}^{\text{QND}} = 0.94(2)$  ( $P_0^{\text{QND}} = 0.97[2]$ ,  $P_1^{\text{QND}} = 0.91[2]$ ). The QND-ness for the state  $|0\rangle$  is likely limited by background atom loss during the sequence time, alongside losses during the tweezer-off time. For the state  $|1\rangle$ , the additional errors are likely due to a combination of the additional pair of microwave pulses and the fact that the Rb atom undergoes Rydberg excitation in this case.

## 11. Master equation simulations

To analyze ground-Rydberg qubit dynamics and the entangling operations implemented on hyperfine qubits, we perform modeling using a Master equation solver based on the QuTiP Python toolkit [23]. For each atomic species, our model incorporates the following levels,  $\{|0\rangle, |1\rangle, |i\rangle, |r\rangle, |r'\rangle, |l\rangle\}$ . Here  $|0\rangle$  and  $|1\rangle$  are hyperfine clock-states,  $|i\rangle$  is the intermediate state for the two-photon excitation process,  $|r\rangle$  and  $|r'\rangle$  are the desired ( $m_j = 1/2$ ) and erroneous ( $m_j = -1/2$ ) Rydberg states, and  $|l\rangle$  is an effective ‘leakage’ state encompassing atom loss and decay to states outside the qubit subspace.

A summary of the relevant decoherence mechanisms and their modeling is given in the following sections. The timescale and functional form for each process is either derived from an independent characterization measurement, or taken from literature values. Each mechanism is incorporated into the model via the relevant jump operator. Throughout the evolution, the amplitude of these operators is varied depending on the system Hamiltonian at a given point in time (for example, if the qubit is idle or being driven).

The relevant experimental parameters are given in Table S2, while the decoherence timescales and associated functional forms are given in Table S3. The values for the Rabi frequencies and dephasing timescales correspond to a representative dataset taken during the hyperfine entanglement measurements.

| Parameter                                                 | Value Rb    | Value Cs    |
|-----------------------------------------------------------|-------------|-------------|
| Rydberg $n$                                               | 68          | 67          |
| Rydberg $m_j$ splitting [MHz]                             | 18.6(1)     |             |
| Magnetic field, $B_z$ [G]                                 | 6.65(3)     |             |
| Hyperfine splitting [GHz]                                 | 9.1926 [24] | 6.8347 [25] |
| Hyperfine Rabi frequency [kHz]                            | 5.62(2)     | 8.55(4)     |
| Intermediate-state detuning* [GHz]                        | -2.34       | 1.27        |
| Diff. Stark shift induced by g-e drive [MHz]              | 6.42(1)     | 3.05(1)     |
| Single-photon Rabi frequency, g-e [MHz]                   | 199.6(2)    | 131.4(2)    |
| Single-photon Rabi frequency, e-r [MHz]                   | 55.80(3)    | 35.97(5)    |
| Two-photon Rabi frequency, g-r [MHz]                      | 2.380(5)    | 1.860(7)    |
| Rydberg interaction strength, $V_{\text{eff}}^{**}$ [MHz] | 24          |             |
| Temperature at drop [ $\mu\text{K}$ ]                     | 18          | 30          |

Table S2. **Experimental parameters used in numerical simulations.** Summary of the values used for numerical simulations as derived from experimental data. \*: Defined with respect to the ground-intermediate state transition frequency. \*\*: Effective strength, see text.

| Parameter                                                          | Value Rb | Value Cs | Decay shape |
|--------------------------------------------------------------------|----------|----------|-------------|
| Rydberg state lifetime $T_{1,r}$ [ $\mu\text{s}$ ]                 | 138 [8]  | 126 [8]  | Exponential |
| Intermediate state $T_{1,e}$ [ns]                                  | 129 [8]  | 154 [8]  | Exponential |
| Atom loss (2.5 $\mu\text{s}$ drop)                                 | 0.004(6) | 0.009(7) | Exponential |
| $T_{2,\text{gr}}^*$ (idle) [ $\mu\text{s}$ ]                       | 0.81(5)  | 0.9(1)   | Exponential |
| $T_{2,\text{gr}}^{\text{d}}$ (driven) [ $\mu\text{s}$ ]            | 4.1(4)   | 4.6(6)   | Gaussian    |
| $T_{2,\text{hf}}^*$ (idle) [ms]                                    | 6.7(5)   | 0.26(3)  | Gaussian    |
| $T_{2,\text{hf}}$ (single-echo) [ms]                               | 52(7)    | 12(1)    | Gaussian    |
| $T_{2,\text{hf}}^{\text{Ryd}}$ (Rydberg driving) [ $\mu\text{s}$ ] | 1.62(9)  | 2.5(2)   | Gaussian    |

Table S3. **Decoherence parameters used for error modelling.** Values with error-bars are extracted from fits to independent measurements using the given decay function.

## Error sources

### 11.1. Blockade strength

In this work, we choose to utilize Rydberg states exhibiting an interspecies Förster resonance. Here, the concept of blockade strength as usually considered for the van der Waals regime is more complex. In particular, for the Förster resonance, there are now multiple pair-state eigenstates of the interaction Hamiltonian which have non-negligible overlap with the bare pair-state  $|68, 67\rangle_{\text{Rb, Cs}}$ . The double excitation probability is given by a sum over the transition amplitudes from singly-excited states to these pair-states. For simplicity, we capture this in the Master equation via an effective blockade strength, introduced as a density-density operator on the bare pair-state:  $V|r, r\rangle\langle r, r|$ . We further assume uniform  $V$  for all combinations of  $|r\rangle, |r'\rangle$ .

To calculate the effective blockade strength,  $V$ , we take an approach inspired by de Léséleuc, Weber et al. [26]. Under a simplified Hamiltonian comprising a single ground state and direct ground-Rydberg coupling, we solve the Schrödinger equation across a driving period of 10  $\mu\text{s}$ , taking into account the 10 Rydberg pair-states with the largest overlap to the bare state, which we identify using the Pairinteraction software package [9]. Considering a single-atom Rabi frequency of 2 MHz, we find a time-averaged  $p_{rr} = 0.002$  (the sum of the populations in doubly-excited states). We find an equivalent time-averaged  $p_{rr}$  occurs for a single excitation channel with an effective interaction strength of  $V = 24$  MHz.

### 11.2. Atomic state lifetimes

Within the two-photon excitation scheme, there is a probability to populate the intermediate state, which decays on a fast timescale (129 ns [Rb], 154 ns [Cs] [8]). We make a worst-case assumption here that all scattering results in a leakage error. Similarly, we account for finite Rydberg state lifetimes of 138  $\mu\text{s}$  and 126  $\mu\text{s}$  for Rb and Cs respectively, which we calculate using ARC [8]. This is broken down into radiative-decay and black-body channels of 342  $\mu\text{s}$ , 231  $\mu\text{s}$  (Rb) and 300  $\mu\text{s}$ , 217  $\mu\text{s}$  (Cs). For simplicity, here we again assume that all decay results in leakage errors. We separately account for scattering due to the IR excitation beams which remain on for the duration of the  $\pi$ - $2\pi$ - $\pi$  scheme. Our modelling predicts that the presence of this light results in an effective  $T_{1,R}^{\text{Rb}} = 113$   $\mu\text{s}$ ,  $T_{1,R}^{\text{Cs}} = 92$   $\mu\text{s}$ .

### 11.3. Atom loss

In the analysis of the hyperfine-basis two-qubit gate, we neglect state-preparation and measurement errors (see ‘SPAM correction’ section for description of the correction of the measured data). Thus, in this case, atom loss only enters from the finite drop time of the tweezers for Rydberg excitation. We implement this as a decay of all levels to the  $|l\rangle$  state during the Rydberg pulses.

For the ground-Rydberg experiments, we do not SPAM correct, but do perform SP-pushout prior to the measurements in order to avoid unwanted excitation dynamics from incorrectly prepared atoms. We model this by an initial population  $\epsilon_{\text{SP}}$  in the  $|l\rangle$  state, which is treated as a dark state in the final measurement.

### 11.4. Rydberg detection

For the ground-Rydberg experiments, we account for a finite Rydberg detection error,  $\epsilon_{\text{Ryd}}$ , which is captured by the measurement operators:

$$\Pi_{\text{bright}} = \Pi_0 + \Pi_1 + \epsilon_{\text{Ryd}}(\Pi_r + \Pi_{r'}), \quad (\text{S11})$$

$$\Pi_{\text{dark}} = (1 - \epsilon_{\text{Ryd}})(\Pi_r + \Pi_{r'}) + \Pi_i + \Pi_l. \quad (\text{S12})$$

Here,  $\Pi_{\text{bright}}, \Pi_{\text{dark}}$  are the projection operators for the ‘bright’ and ‘dark’ measurement outcomes.

To find  $\epsilon_{\text{Ryd}}$ , we then assume that the height of the Rabi oscillation is only limited by finite coherence and Rydberg state detection. Noting that, after SP-pushout, the atom loss probabilities take values in the range  $\{\epsilon_{\text{SP}}, 1\}$ , we can correct the data as  $P_{\text{retained}}^{\text{SP}} = (1 - P_{\text{loss}})/(1 - \epsilon_{\text{SP}})$ . We then extrapolate the peak of the Rabi oscillations (minimal  $P_{\text{retained}}^{\text{SP}}$ ) back to  $t = 0$  using the fitted decay function, which is our best estimate for  $\epsilon_{\text{Ryd}}$  [27]. Based on the fitted decay of our ground-Rydberg Rabi oscillations, we estimate that the  $\pi$ -pulse fidelity is  $>99\%$  on both species.

### 11.5. Dephasing mechanisms

Our two-qubit gate fidelity is limited predominantly by dephasing mechanisms. Here, we outline the relevant timescales and decay forms as used for the Master equation jump operators. We also elucidate our understanding of the mechanisms behind them.

The  $\pi$ - $2\pi$ - $\pi$  gate scheme is particularly sensitive to idle dephasing of the control qubit (Cs  $T_{2,\text{gr}}^*$ ). We measure exponential-type dephasing with a characteristic timescale of  $0.9(1)$   $\mu\text{s}$  via a ground-Rydberg Ramsey measurement. The measured atom temperature of  $\sim 30$   $\mu\text{K}$  (Doppler shift of  $\omega_{\text{D}} \sim 2\pi \cdot 54$  kHz) corresponds to an expected dephasing timescale of  $T_{\text{D}} = \sqrt{2}\omega_{\text{D}}^{-1} \sim 4$   $\mu\text{s}$ . We thus hypothesize that the dephasing time is primarily limited by phase noise of the Rydberg lasers, which will be characterized in detail in future work.

Beyond  $T_{2,\text{gr}}^*$ , there is dephasing which occurs during the two-photon drive on each species. This manifests in two forms. First, on the ground-Rydberg qubit, we measure a damping of the Rabi oscillations ( $\Omega_{\text{gr}}^{\text{Rb}} = 2\pi \cdot 2.380(5)$  MHz,  $\Omega_{\text{gr}}^{\text{Cs}} = 2\pi \cdot 1.860(7)$  MHz) with characteristic timescales of  $T_{2,\text{gr}}^{\text{d,Rb}} = 4.1(4)$   $\mu\text{s}$  and  $T_{2,\text{gr}}^{\text{d,Cs}} = 4.6(6)$   $\mu\text{s}$  ( $N_{\text{cycles}}^{\text{gr}} = 9.8[9], 8.6[1.1]$ ). Second, within a Ramsey-type measurement with variable blue pulse length, we observe dephasing of the hyperfine qubit due to the differential AC Stark-shift between the  $|0\rangle$  and  $|1\rangle$  states. The measured Stark shifts and dephasing timescales are  $\delta_{\text{AC,blue}}^{\text{Rb}} = 6.42(1)$  MHz,  $T_{2,\text{hf}}^{\text{d,Rb}} = 1.62(9)$   $\mu\text{s}$  and  $\delta_{\text{AC,blue}}^{\text{Cs}} = 3.05(1)$  MHz,  $T_{2,\text{hf}}^{\text{d,Cs}} = 2.5(2)$   $\mu\text{s}$  ( $N_{\text{cycles}}^{\text{hf}} = 10.4[6], 7.6[6]$ ). For both the gr and hyperfine dephasing, we find Gaussian decay ( $\exp[-(t/T)^2]$ ).

For the Stark-shift measurements, the blue light is far off-resonant in the absence of the IR drive, and so phase noise is not expected to play a role. Assuming quasi-static, normally-distributed intensity noise with standard deviation  $\sigma_{\text{I,blue}}$ , the expected number of coherent Stark-shift oscillations ( $1/e$  decay) can be found to be:  $N_{\text{cycles}}^{\text{hf}} = [\sqrt{2}\pi\sigma_{\text{I}}]^{-1}$ . Inverting the measured  $N_{\text{cycles}}^{\text{hf}}$ , we obtain estimates for  $\sigma_{\text{I,blue}}^{\text{Rb}} = 0.022(1)$  and  $\sigma_{\text{I,blue}}^{\text{Cs}} = 0.030(2)$ . This is inconsistent with independent measurements of the intensity fluctuations of the Rydberg pulses as measured on a fast photodiode, for which we find  $\sigma_{\text{I}}$  to be less than 1% for all Rydberg beams. We thus hypothesize that this decay comes from movement of the atoms within the laser intensity profiles. This could be alleviated by beam shaping [28]. Balancing the single-photon Rabi frequencies (presently limited by IR laser power) would lead to a  $\sim 4x$  reduction in the differential Stark shifts, or a  $\sim 4x$  improvement in  $N_{\text{cycles}}^{\text{hf}}$ . This would likely also improve the ground-Rydberg coherence, as it can be shown that — in the case of equal intensity fluctuations on the legs of the two-photon drive — two-photon detuning errors arising from intensity noise are minimized for balanced single-photon Rabi frequencies. Finally, the implementation of fast hyperfine control via Raman driving would enable echoing of the differential Stark shift [27].

For the damping of the Rydberg Rabi oscillations, intensity noise from both legs plays a role, as does laser phase noise. It is challenging to independently extract a value for the infrared intensity noise via a differential Stark-shift measurement, as the Stark shifts are comparable to the inverse hyperfine coherence time (sub-kHz). Neglecting phase noise allows estimation of  $\sigma_{\text{I,IR}}^{\text{Rb}} = 0.040(5)$  and  $\sigma_{\text{I,IR}}^{\text{Cs}} = 0.043(8)$  via Monte Carlo modeling. However, these values are also inconsistent with photodiode measurements and may well be an overestimate. Detailed studies of the phase noise spectrum of the four Rydberg lasers will be required to further understand the limits to both the driven and undriven ground-Rydberg coherence [29].

### 11.6. Error budget for the two-qubit gate

Combining the mechanisms discussed above, we give an error budget for the two-qubit gate in Table S4.

| Parameter                     | Independent infidelity | Cumulative BSF |
|-------------------------------|------------------------|----------------|
| Intermediate-state scattering | 0.0128                 | 0.9872         |
| Idle gr dephasing             | 0.2032                 | 0.7861         |
| Differential Stark dephasing  | 0.0435                 | 0.7541         |
| Atom loss                     | 0.0120                 | 0.7451         |
| Driven gr dephasing           | 0.0085                 | 0.7395         |
| Rydberg decay                 | 0.0031                 | 0.7372         |
| Finite blockade               | 0.0018                 | 0.7359         |
| Coupling to $ r'\rangle$      | 0.0008                 | 0.7327         |

Table S4. **Bell state generation error budget.** ‘Independent infidelity’ is the simulated Bell state infidelity in the presence of only that error channel. To obtain these infidelities in the absence of intermediate-state scattering we separately use a 5-level model (removing  $|i\rangle$ ) with a direct  $|1\rangle \leftrightarrow |r/r'\rangle$  coupling at the two-photon Rabi frequency). In this case we neglect  $|0\rangle \leftrightarrow |r/r'\rangle$  coupling. ‘Cumulative BSF’ is the Bell state fidelity including all error channels up to that entry in the table, calculated using the full 6-level model.

## 11.7. Ground-Rydberg simulations

The values used in the ground-Rydberg numerical simulations (Fig. 3c-e) are given in Table S5. In Fig. S8 we reproduce the simultaneous driving results presented in Fig. 3 of the main text alongside noise-free simulations which show the ideal dynamics in the absence of SPAM or decoherence errors.

| Parameter                                               | $\eta = 1.08(1)$ |          | $\eta = 1.86(2)$ |         |
|---------------------------------------------------------|------------------|----------|------------------|---------|
|                                                         | Rb               | Cs       | Rb               | Cs      |
| $\epsilon_{\text{SP}}$                                  | 0.18(2)          | 0.23(1)  | 0.26(1)          | 0.29(1) |
| $\epsilon_{\text{Ryd}}$                                 | 0.07(3)          | 0.15(3)  | 0.07(3)          | 0.15(3) |
| $\Omega$ [MHz]                                          | 1.92(1)          | 1.78(1)  | 1.93(1)          | 1.04(1) |
| $T_{2,\text{gr}}^{\text{d}}$ (driven) [ $\mu\text{s}$ ] | 3.6(9)           | 5.1(1.7) | 3.6(9)           | 3.4(4)  |

Table S5. **Parameters for ground-Rydberg qubit simulations.** Parameters used for the ground-Rydberg qubit simulations performed in Fig. 3c-e of the main text and in ED Figs. S8, S9.  $\epsilon_{\text{SP}}$  is found as the offset,  $o$ , when fitting the single-atom loss probability during (unblocked) Rabi oscillations to the function:  $f(t) = o + A(1 - \cos(\Omega(t - t_0))) \exp[-(t/T_{2,\text{gr}}^{\text{d}})^2]$ .

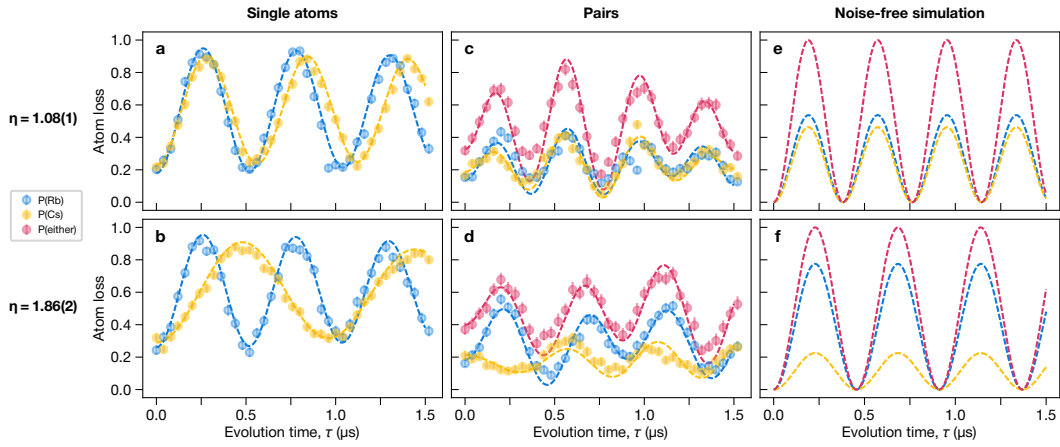

Fig. S8. **Interspecies Rydberg dynamics.** **a-d** Replicated from Fig. 3. **a, b**, Rydberg Rabi frequencies are determined by driving the ground-Rydberg transition on single atoms. **c, d** When simultaneously driving Rb-Cs pairs, Rabi oscillations are observed with enhanced frequency and decreased excitation probability per atom. The dynamics are affected by SPAM errors, but these effects are captured by simulations including the same errors (dashed lines). **e, f**, In the absence of SPAM errors, Rb and Cs are expected to oscillate at the same frequency, but with different amplitudes, determined by the ratio  $\eta = \Omega_{\text{Rb}}/\Omega_{\text{Cs}}$  (methods).

## 12. Collective driving of intraspecies pairs

Alongside the interspecies simultaneous driving results presented in Fig. 3 of the main text, we performed analogous experiments on Rb-Rb and Cs-Cs pairs. For these cases, the Rabi frequency is equal for both atoms. Comparing single-atom Rabi oscillations (Fig. S9a,b) and collective oscillations of pairs of atoms (Fig. S9c,d) we observe both the expected  $\sqrt{2}$  enhancement of the collective Rabi frequency and the 2x suppression of the per-site excitation probability.

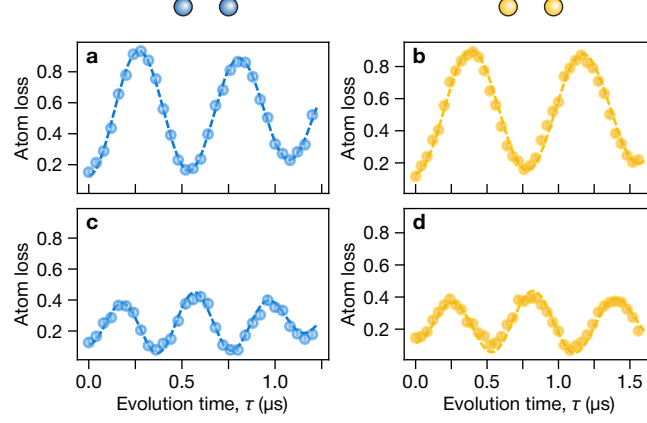

Fig. S9. **Intraspecies Rydberg Rabi oscillations** Similar to the simultaneous driving of Rb-Cs pairs in Fig. 3c-e, pairs of Rb-Rb or Cs-Cs atoms can be driven in the blockade regime. **a, b**, Per-site atom loss when loading single atoms, showing Rabi oscillations between the ground and Rydberg states. **c, d**, When driving pairs of atoms, we recover the standard result: the Rabi frequency is enhanced by a factor of  $\sqrt{2}$  compared to the single-atom case, and the per-atom excitation probability is no larger than 1/2. These results show that a strong blockade is still achieved for intra- as well as interspecies operations, provided the atoms are sufficiently close to each other (here 5.6  $\mu\text{m}$ ).

## 13. Simultaneous driving with independent Rabi frequencies

We consider the Hamiltonian:

$$\mathcal{H} = \frac{\hbar}{2}\Omega_1(|gg\rangle\langle rg| + |gr\rangle\langle rr| + h.c.) + \frac{\hbar}{2}\Omega_2(|gg\rangle\langle gr| + |rg\rangle\langle rr| + h.c.) + V|rr\rangle\langle rr|, \quad (\text{S13})$$

where  $\Omega_i$  are the Rabi frequencies acting on qubit  $i \in \{1, 2\}$ , and  $V$  is the Rydberg interaction. In the limit  $V \gg \Omega_{1,2}$  (strong blockade), the state  $|rr\rangle$  is frozen out, and the Hamiltonian simplifies to:

$$\mathcal{H}_{\text{blockade}} = \frac{\hbar}{2}\Omega_1(|gg\rangle\langle rg| + h.c.) + \frac{\hbar}{2}\Omega_2(|gg\rangle\langle gr| + h.c.). \quad (\text{S14})$$

Defining a generalized  $W$ -like state:  $|\widetilde{W}\rangle = \frac{\Omega_1^*|rg\rangle + \Omega_2^*|gr\rangle}{\sqrt{\Omega_1^2 + \Omega_2^2}}$ , and collective Rabi frequency  $\widetilde{\Omega} = \sqrt{\Omega_1^2 + \Omega_2^2}$ , this becomes:

$$\mathcal{H}_{\text{blockade}} = \widetilde{\Omega}(|gg\rangle\langle \widetilde{W}| + h.c.). \quad (\text{S15})$$

That is, the system oscillates between  $|gg\rangle$  and  $|\widetilde{W}\rangle$  with a Rabi frequency  $\widetilde{\Omega}$ . For the special case of  $\Omega_1 = \Omega_2$ , we retrieve the standard result of  $\widetilde{\Omega} = \sqrt{2}\Omega_1$ ,  $|\widetilde{W}\rangle = (|rg\rangle + |gr\rangle)/\sqrt{2} := |W\rangle$ .

## 14. Quantum State Transfer

Species-selective Rydberg excitation enable simple pulse schemes for performing quantum state transfer and controlling the spatial flow of quantum information [30]. Beginning first with a pair of Rb and Cs atoms in the  $|1\rangle_{\text{Rb}}|1\rangle_{\text{Cs}}$  state, we can use a global drive on the Rb atoms to create the following superposition in the  $(|1\rangle \leftrightarrow |r\rangle)$  qubit space:  $(\alpha|1\rangle_{\text{Rb}} + \beta|r\rangle_{\text{Rb}})|1\rangle_{\text{Cs}}$ . Within the strongly-blockaded regime, a Rydberg  $\pi$ -pulse on the Cs atom and a subsequent  $\pi$ -pulse on the Rb atom can then be

used to transfer the quantum information from Rb to Cs, up to a single-qubit X-rotation on the Cs qubit:

$$\begin{aligned}
 (\alpha |1\rangle_{\text{Rb}} + \beta |r\rangle_{\text{Rb}}) |1\rangle_{\text{Cs}} &= \alpha |1\rangle_{\text{Rb}} |1\rangle_{\text{Cs}} + \beta |r\rangle_{\text{Rb}} |1\rangle_{\text{Cs}} \\
 \pi\text{-pulse on Cs} \rightarrow &= \alpha |1\rangle_{\text{Rb}} |r\rangle_{\text{Cs}} + \beta |r\rangle_{\text{Rb}} |1\rangle_{\text{Cs}} \\
 \pi\text{-pulse on Rb} \rightarrow &= \alpha |1\rangle_{\text{Rb}} |r\rangle_{\text{Cs}} + \beta |1\rangle_{\text{Rb}} |1\rangle_{\text{Cs}} \\
 &= |1\rangle_{\text{Rb}} (\alpha |r\rangle_{\text{Cs}} + \beta |1\rangle_{\text{Cs}}).
 \end{aligned}$$

The experimental results of this quantum operation are shown in Fig. 3f.

- 
- [1] Singh, K. et al. Mid-circuit correction of correlated phase errors using an array of spectator qubits. *Science* **380**, 1265-1269 (2023).
- [2] Singh, K., Anand, S., Pocklington, A., Kemp, J. & Bernien, H. Dual-Element, Two-Dimensional Atom Array with Continuous-Mode Operation. *Phys. Rev. X* **12**, 011040 (2022).
- [3] Jaksch, D. et al. Fast quantum gates for neutral atoms. *Phys. Rev. Lett.* **85**, 2208 (2000).
- [4] Drever, R. et al. Laser phase and frequency stabilization using an optical resonator. *Appl. Phys. B* **31**, 97–105 (1983).
- [5] Thorpe, J., Numata, K. & Livas, J. Laser frequency stabilization and control through offset sideband locking to optical cavities. *Opt. Express* **16**, 15980–15990 (2008).
- [6] Mamat, B. et al. Mitigating noise of residual electric fields for single Rydberg atoms with electron photodesorption. Preprint at <https://arxiv.org/abs/2312.02597> (2023).
- [7] Maller, K. et al. Rydberg-blockade controlled-not gate and entanglement in a two-dimensional array of neutral-atom qubits. *Phys. Rev. A* **92**, 022336 (2015).
- [8] Šibalić, N., Pritchard, J., Adams, C. & Weatherill, K. ARC: An open-source library for calculating properties of alkali Rydberg atoms. *Comput. Phys. Commun.* **220**, 319–331 (2017).
- [9] Weber, S. et al. Tutorial: Calculation of Rydberg interaction potentials. *J. Phys. B: At. Mol. Opt. Phys.* **50**, 133001 (2017).
- [10] Bernien, H. et al. Probing many-body dynamics on a 51-atom quantum simulator. *Nature* **551**, 579–584 (2017).
- [11] Ravets, S. et al. Coherent dipole-dipole coupling between two single Rydberg atoms at an electrically-tuned Förster resonance. *Nat. Phys.* **10**, 914–917 (2014).
- [12] Müller, M., Lesanovsky, I., Weimer, H., Büchler, H. & Zoller, P. Mesoscopic Rydberg gate based on electromagnetically induced transparency. *Phys. Rev. Lett.* **102**, 170502 (2009).
- [13] Browaeys, A., Barredo, D. & Lahaye, T. Experimental investigations of dipole–dipole interactions between a few Rydberg atoms. *J. Phys. B: At. Mol. Opt. Phys.* **49**, 152001 (2016).
- [14] Beterov, I. & Saffman, M. Rydberg blockade, Förster resonances, and quantum state measurements with different atomic species. *Phys. Rev. A* **92**, 042710 (2015).
- [15] Ravets, S., Labuhn, H., Barredo, D., Lahaye, T. & Browaeys, A. Measurement of the angular dependence of the dipole-dipole interaction between two individual Rydberg atoms at a Förster resonance. *Phys. Rev. A* **92**, 020701 (2015).
- [16] McDonnell, K., Keary, L. & Pritchard, J. Demonstration of a quantum gate using electromagnetically induced transparency. *Phys. Rev. Lett.* **129**, 200501 (2022).
- [17] Ma, S. et al. High-fidelity gates and mid-circuit erasure conversion in an atomic qubit. *Nature* **622**, 279–284 (2023).
- [18] Magesan, E. et al. Efficient measurement of quantum gate error by interleaved randomized benchmarking. *Phys. Rev. Lett.* **109**, 080505 (2012).
- [19] Nielsen, E. et al. Gate set tomography. *Quantum* **5** 557 (2021).
- [20] Martinez-dorantes, M. et al. Fast nondestructive parallel readout of neutral atom registers in optical potentials. *Phys. Rev. Lett.* **119**, 180503 (2017).
- [21] Kwon, M., Ebert, M., Walker, T. & Saffman, M. Parallel low-loss measurement of multiple atomic qubits. *Phys. Rev. Lett.* **119**, 180504 (2017).
- [22] Bluvstein, D. et al. Logical quantum processor based on reconfigurable atom arrays. *Nature* **626**, 58-65 (2024).
- [23] Johansson, J., Nation, P. & Nori, F. QuTiP 2: A Python framework for the dynamics of open quantum systems. *Comput. Phys. Commun.* **184**, 1234–1240 (2013).
- [24] Steck, D. Rubidium87 D line data. <http://steck.us/alkalidata> (2001).
- [25] Steck, D. Cesium D line data. <http://steck.us/alkalidata> (2003).
- [26] de Léséleuc, S. et al. Accurate mapping of multilevel Rydberg atoms on interacting spin-1/2 particles for the quantum simulation of Ising models. *Phys. Rev. Lett.* **120**, 113602 (2018).
- [27] Levine, H. et al. Parallel implementation of high-fidelity multiqubit gates with neutral atoms. *Phys. Rev. Lett.* **123**, 170503 (2019).
- [28] Ebadi, S. et al. Quantum phases of matter on a 256-atom programmable quantum simulator. *Nature* **595**, 227–232 (2021).
- [29] de Léséleuc, S., Barredo, D., Lienhard, V., Browaeys, A. & Lahaye, T. Analysis of imperfections in the coherent optical excitation of single atoms to Rydberg states. *Phys. Rev. A* **97**, 053803 (2018).
- [30] Cesa, F. & Pichler, H. Universal quantum computation in globally driven Rydberg atom arrays. *Phys. Rev. Lett.* **131**, 170601 (2023).
